# Supplementary material for: Folic acid-conjugated gold nanorod@polypyrrole@Fe3O4nanocomposites for targeted MR/CT/PA multimodal imaging and chemo-photothermal therapy
Source: Royal Society of Chemistry journal article supplement (doi:10.1039/c9ra00541b), 2019-01-01
Supplement: c9ra00541b1.pdf [file c9ra00541b1.pdf]

## Supporting Information

### **Folic acid-conjugated gold nanorod@polypyrrole@Fe<sub>3</sub>O<sub>4</sub> nanocomposites for targeted MR/CT/PA multimodal imaging and chemo-photothermal therapy**

Wei Cao,<sup>a,b,d</sup> Xuandong Wang,<sup>a,b,d</sup> Liang Song,<sup>a,b</sup> Peiyuan Wang,<sup>a,b</sup> Xuemei Hou,<sup>a,b</sup> Huicong Zhang,<sup>a,b</sup> Xiangdong Tian,<sup>a,b</sup> Xiaolong Liu \*<sup>a,b,c</sup> and Yun Zhang\*<sup>a,b</sup>

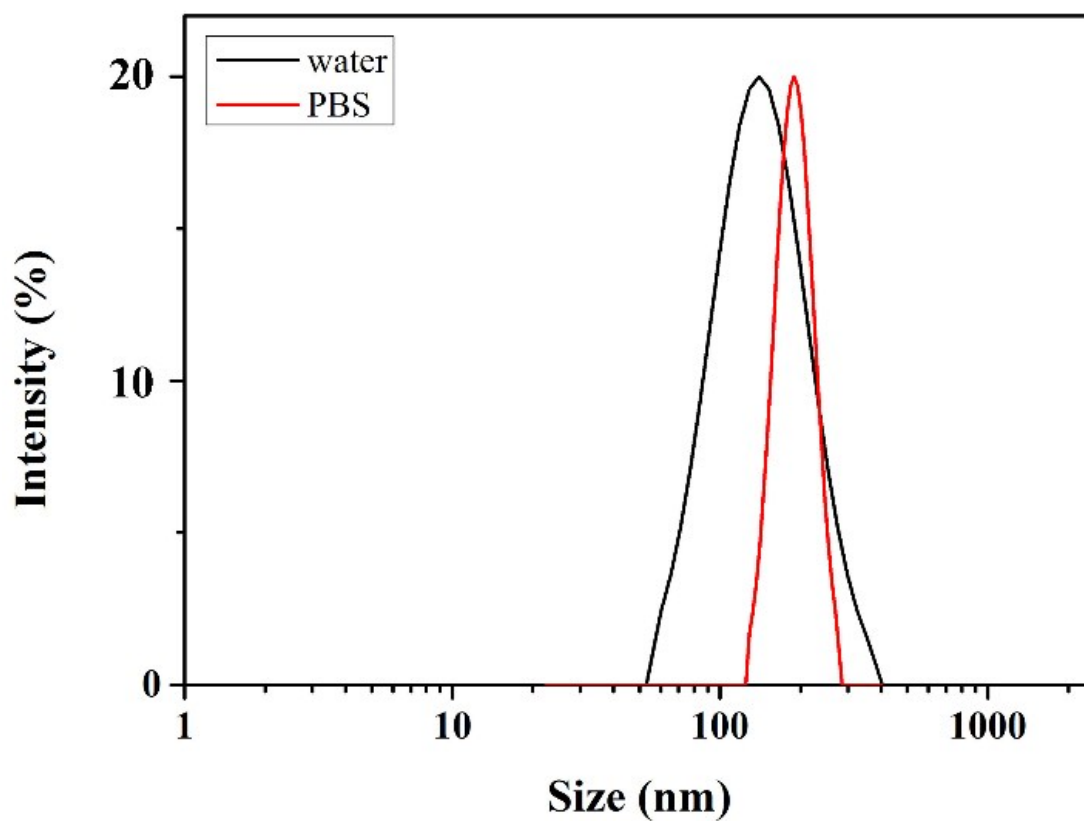

Figure S1 the particle size distribution of GNR@PPy@Fe<sub>3</sub>O<sub>4</sub>-DOX-FA in water and PBS (pH=7.4)

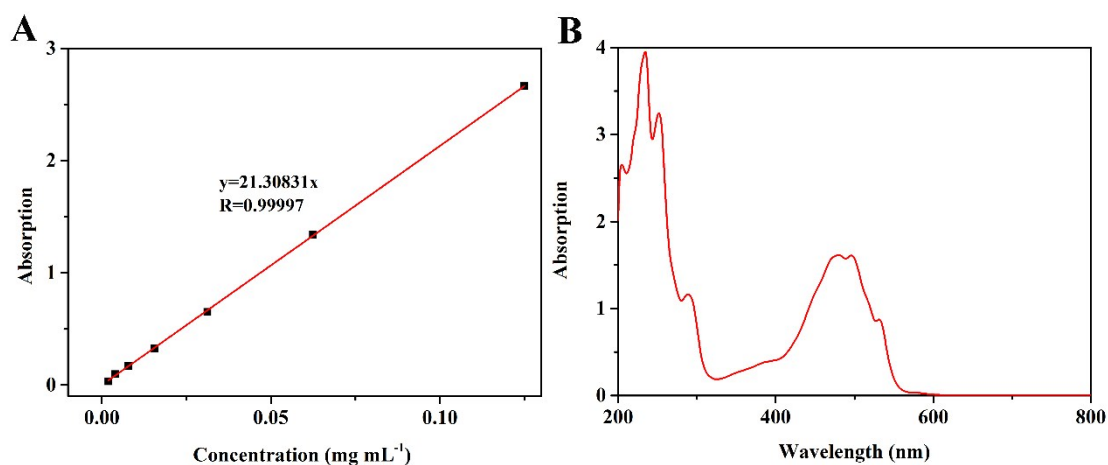

Figure S2 (A) The established standard curve of DOX at about 480 nm by UV-VIS-NIR absorption spectra; (B) UV-VIS-NIR absorption spectrum of DOX in supernatant.

Table S1 The amounts of Au and Fe after cellular uptake with or without magnet

|         | GNR@PPy@Fe <sub>3</sub> O <sub>4</sub> -<br>DOX | GNR@PPy@Fe <sub>3</sub> O <sub>4</sub> -<br>DOX-FA | GNR@PPy@Fe <sub>3</sub> O <sub>4</sub> -<br>DOX-FA+magnet |
|---------|-------------------------------------------------|----------------------------------------------------|-----------------------------------------------------------|
| Au (μg) | 0.50504                                         | 0.94052                                            | 1.24052                                                   |
| Fe (μg) | 0.87754                                         | 1.48677                                            | 1.91077                                                   |
